# Supplementary material for: The transcriptional PPARβ/δ network in human macrophages defines a unique agonist-induced activation state
Source: PubMed Central journal article supplement — Nucleic Acids Res. 2015 Apr 30;43(10):5033–51. doi: 10.1093/nar/gkv331 (PMC4446423; doi:10.1093/nar/gkv331), 2015-04-30
Supplement: supp_gkv331_nar-03647-x-2014-File011.pdf [file supp_gkv331_nar-03647-x-2014-File011.pdf]

## Supplementary Figures

### **The transcriptional PPAR $\beta/\delta$ network in human macrophages defines a unique agonist-induced activation state**

Till Adhikary<sup>1</sup>, Annika Wortmann<sup>1</sup>, Tim Schumann<sup>1</sup>, Florian Finkernagel<sup>1</sup>,  
Sonja Lieber<sup>1</sup>, Katrin Roth<sup>2</sup>, Philipp M. Toth<sup>3</sup>, Wibke E. Diederich<sup>3</sup>, Andrea Nist<sup>4</sup>,  
Thorsten Stiewe<sup>4</sup>, Lara Kleinesudeik<sup>5</sup>, Silke Reinartz<sup>5</sup>, Sabine Müller-Brüsselbach<sup>1</sup>  
and Rolf Müller<sup>1\*</sup>

<sup>1</sup> Institute of Molecular Biology and Tumor Research (IMT), <sup>2</sup> Cellular Imaging Core Facility, <sup>3</sup> Institute of Pharmaceutical Chemistry, <sup>4</sup> Genomics Core Facility, <sup>5</sup> Clinic for Gynecology, Gynecological Oncology and Gynecological Endocrinology; Center for Tumor Biology and Immunology (ZTI), Philipps University, 35043 Marburg, Germany

The first 4 authors should be regarded as joint First Authors

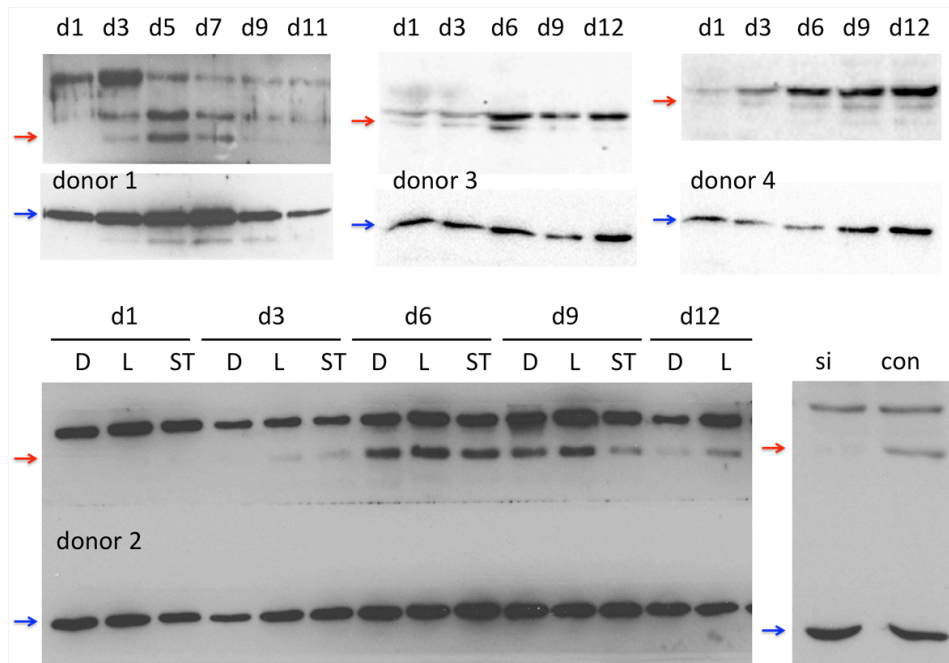

**Figure S1** – Immunoblot analysis of PPAR $\beta/\delta$  expression during MDM differentiation. The blot shows the data for cells from four different donors used for the quantification in Figure 1B. Red arrows: PPAR $\beta/\delta$  bands, identified by siRNA-mediated knockdown (bottom right blot). Blue arrows: lactate dehydrogenase (LDH; loading control). PPAR $\beta/\delta$  bands were quantified (ChemiDoc MP) and adjusted to LDH band intensities( Figure 1B). The immunoblot of donor 2 MDMs shows that the agonist L165,041 (L) and the inverse agonist ST247 (ST) have no effect on PPAR $\beta/\delta$  protein expression.

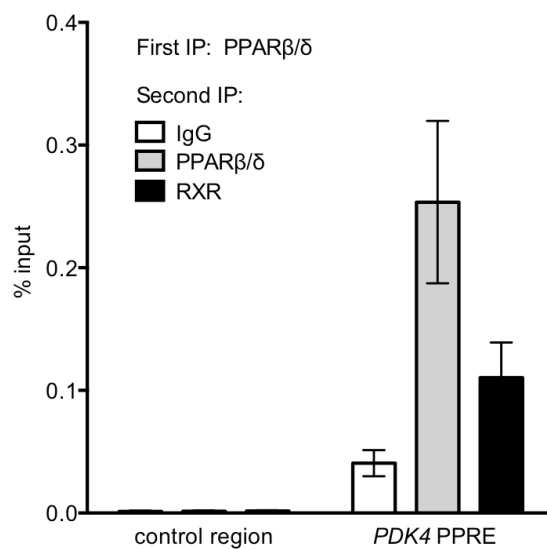

**Figure S2** – Re-ChIP analysis of PPAR $\beta/\delta$ -RXR complexes at the *PDK4* enhancer in MDMs. After differentiation for 7 days, MDMs (sample size = 5) were fixed with formaldehyde, and sequential ChIP (ChIP re-ChIP) was carried out with sc-7197 anti-PPAR $\beta/\delta$  (Santa Cruz), sc-553 anti-RXR (Santa Cruz) or rabbit IgG I5006 (Sigma-Aldrich). For re-ChIP, chromatin complexes were eluted with 50  $\mu$ l of 1X TE containing 2% SDS, 15 mM DTT and protease inhibitors for 30 min at 37  $^{\circ}$ C with agitation. After centrifugation, the supernatant was diluted 30X with dilution buffer (50 mM Tris pH 8.0, 200 mM NaCl, 5 mM EDTA, 0.5% NP40). The second round of IPs was carried out as described in the Methods section. DNA was analyzed by qPCR with primers for the *PDK4* upstream enhancer and an irrelevant control region as in Figure 1D. The control primers had the following sequences: AAGGGATTTCCCAGCAG (forward); GAAATAGCAGGGACCTCGTG (reverse).

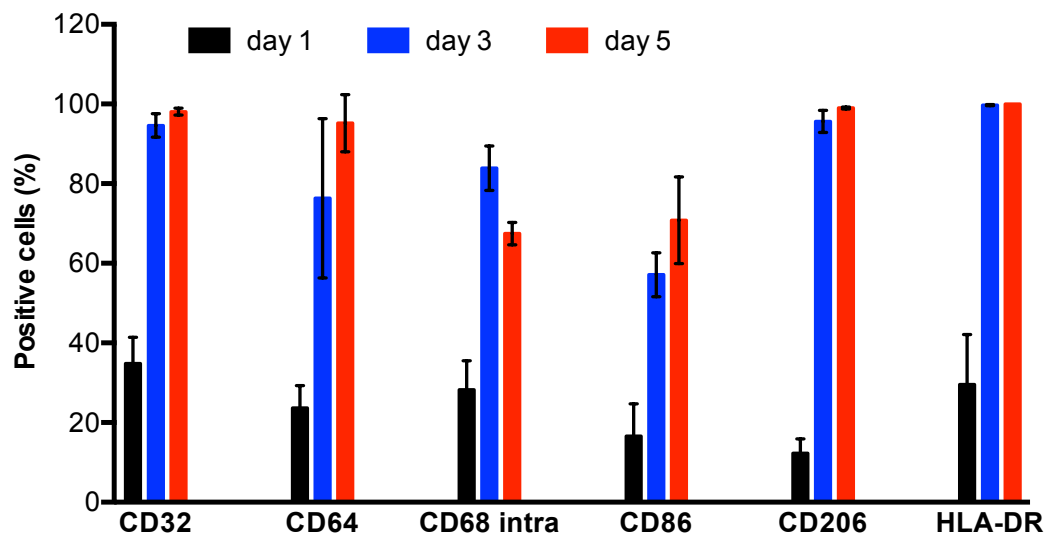

**Figure S3** – Expression of the macrophage surface markers CD32, CD64, CD86, CD206 and HLA-DR and intracellular CD68 on differentiating MDMs (biological replicates with cells from 3 different donors; experimental setup as in Figure 1). Staining and FACS analysis were performed as described in Materials and Methods.

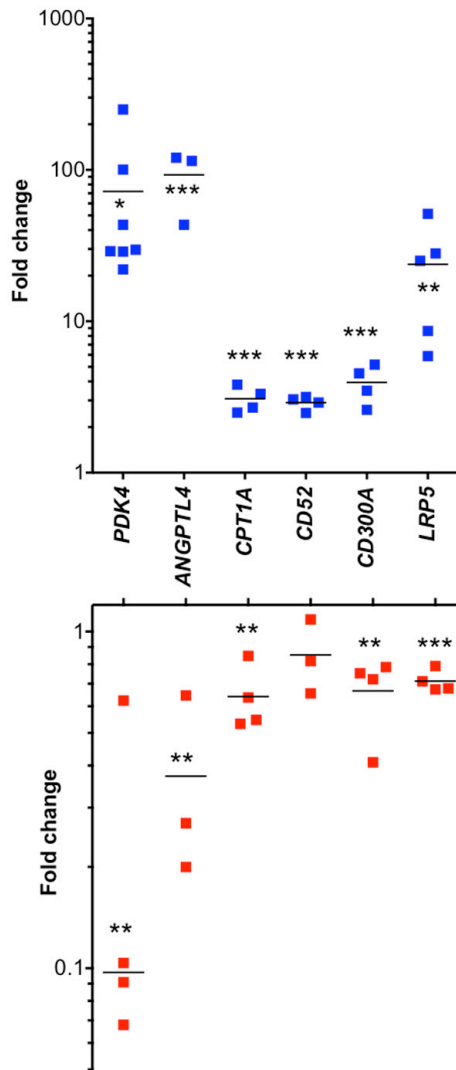

**Figure S4** – RT-qPCR analysis of target gene regulation by L165,041 (agonist; blue dots) and ST247 (inverse agonist; red dots). Each dot represents a biological replicate with cells from a different donor (n = 4-9). Horizontal lines indicate the median. \*P<0.05; \*\*P<0.01; \*\*\*P<0.001 by t-test relative to DMSO-treated cells

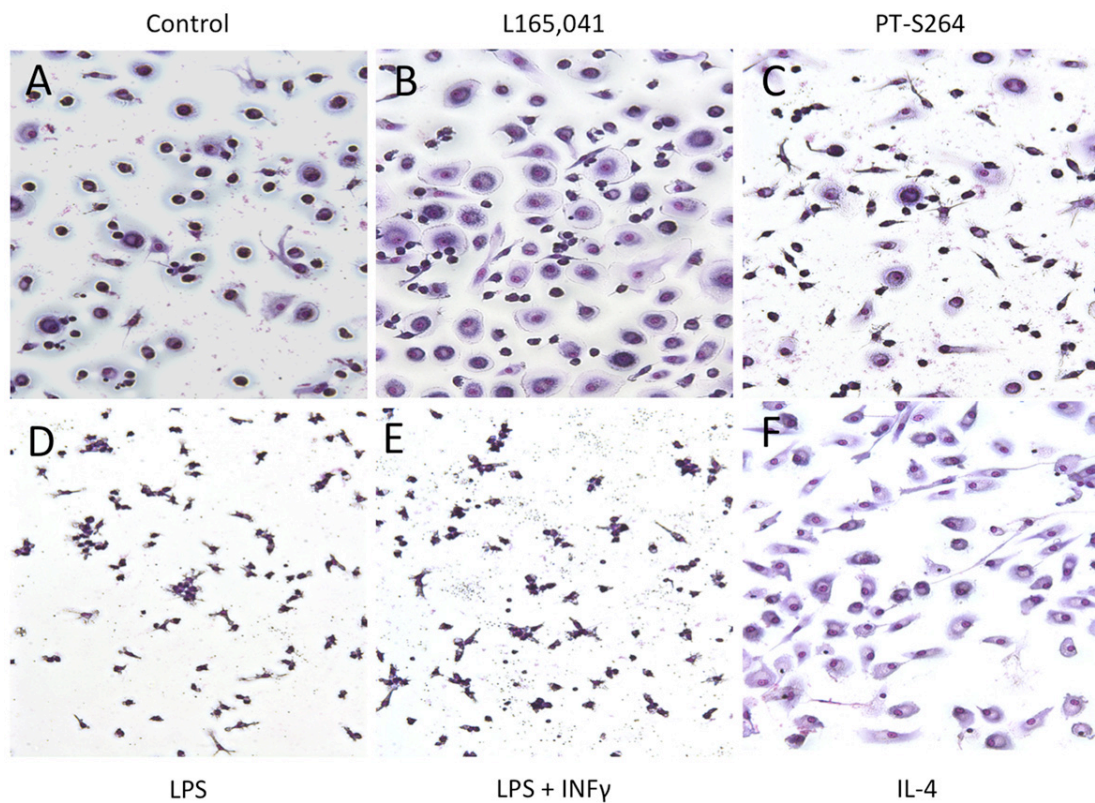

**Figure S5** – Effects of PPAR $\beta/\delta$  ligands on the morphology of human MDMs. Human monocytes were differentiated in R10 medium for 6 d in the presence of the indicated additives. Cells were stained with Giemsa dye after treatment with **(A)** DMSO (solvent control), **(B)** L165,041 (agonist), **(C)** PT-S264 (inverse agonist), **(D)** LPS (“M1” macrophages), **(E)** ILPS+FN $\gamma$  (“M1” macrophages) and **(F)** IL-4 (“M2” macrophages).

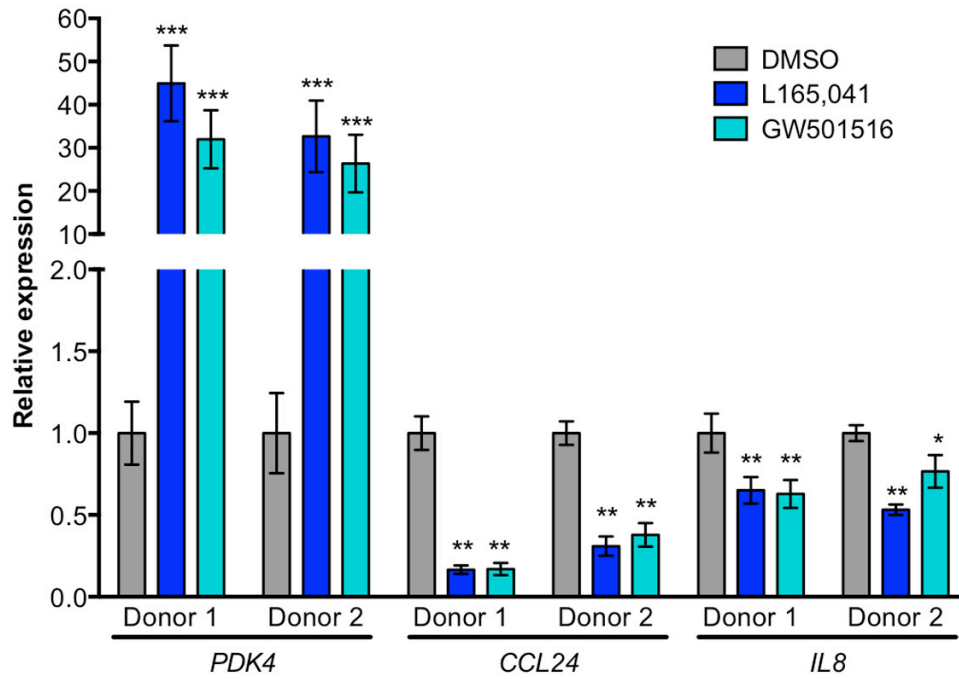

**Figure S6** – RT-qPCR analysis of target gene regulation by GW501516 in MDMs compared to L165,041. The data represent 3 experiments performed with cells from two different donors; error bars show the standard deviation. \*P<0.05; \*\*P<0.01; \*\*\*P<0.001 by t-test relative to DMSO-treated cells.

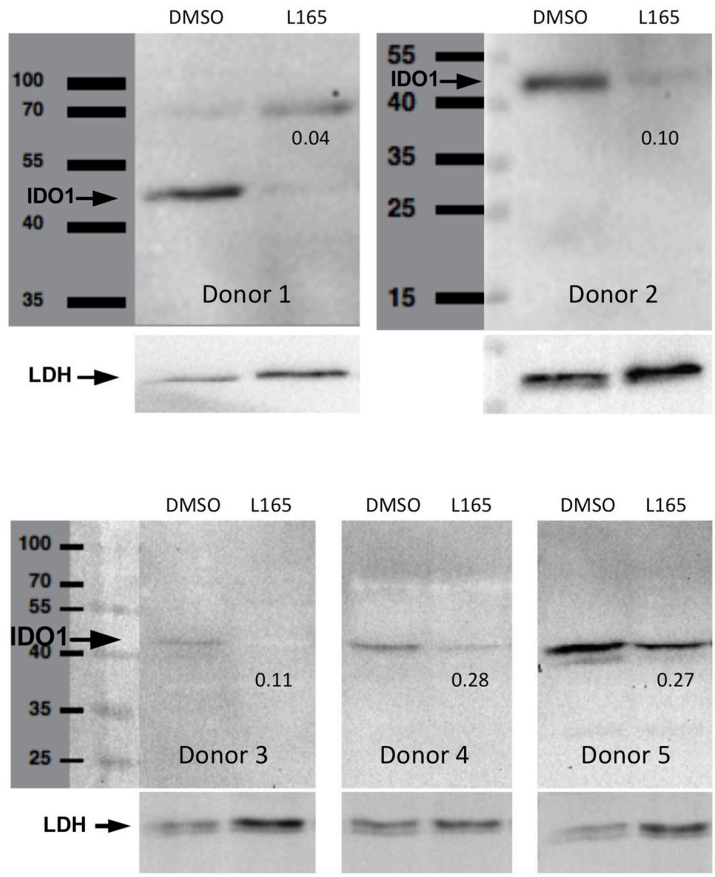

**Figure S7** – Immunoblot analysis of IDO-1 expression in MDMs treated with DMSO or L165,041. The blot shows the data for cell from five different donors (as in Figure 7C). L165: L165,041, LDH: lactate dehydrogenase (loading control). IDO-1 bands were quantified (ChemiDoc MP) and adjusted to LDH band intensities. Expression values (relative to DMSO) are shown below the IDO-1 bands.



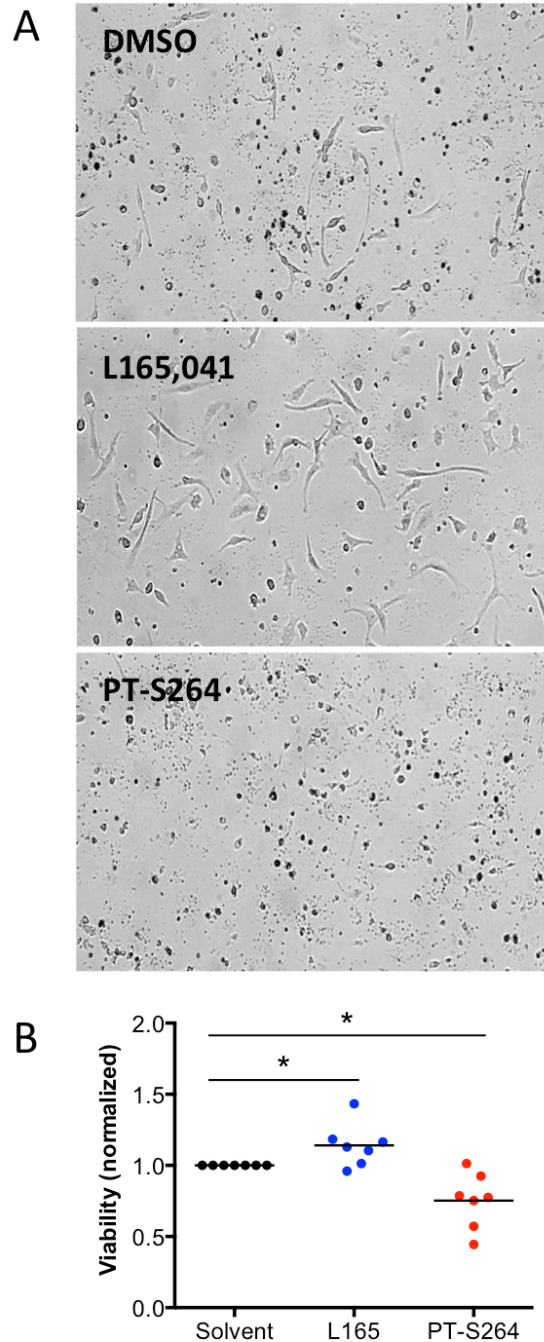

**Figure S8** – Survival of MDMs exposed to hypoxia and L165,041 or PT-S264 for 4 d. (A) Photomicrographs of MDMs subjected to hypoxia for 2 days beginning on day 7 of differentiation in the presence of the indicated ligands or solvent. (B) Viability of adherent cells was determined by MTT assay with MDM from 7 different donors as follows: After the incubation period, cells were treated with 1.2 mM MTT (3-(4,5-dimethylthiazol-2-yl)-2,5-diphenyltetrazolium bromide; Sigma Aldrich) for four hours at 37 °C followed by a three-hour lysis in 0.005 mM HCl and 5% SDS (final concentration) at the same temperature. Measurements were performed with a SpectraMax 340 (MWGbiotech) at 570 nm.

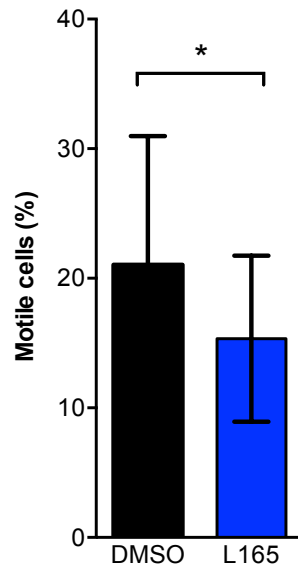

**Figure S9** – Quantification of the MDM motility by time-lapse video microscopy. Cells on day 6 of differentiation (R0 medium) were treated with DMSO or 1  $\mu$ M L165,041 for 2 h and images were captured by life cell video microscopy for 30 min at the same conditions as in regular cell culture incubator (37 °C, 5% CO<sub>2</sub>). Recording was carried out with an Axiovert microscope (Zeiss) equipped with a 10x differential interference contrast (DIC) objective and a CO<sub>2</sub> incubator. Images were captured every 5 min. Cells were tracked with the Image J / Fiji Plugin "Particle Tracker 2D/3D" with a chosen radius of 11, a cutoff of 0,0 a percentile between 1-2, a link range of 5, a displacement of 60 and Brownian dynamics (Sbalzarini and Koumoutsakos, 2005). The data shown are derived from 5 independent experiments, tracking 910 cells in total. Statistical significance was determined by paired t test.

## Reference

Sbalzarini, I.F. and Koumoutsakos, P. (2005) Feature point tracking and trajectory analysis for video imaging in cell biology. *J Struct Biol*, **151**, 182-195.

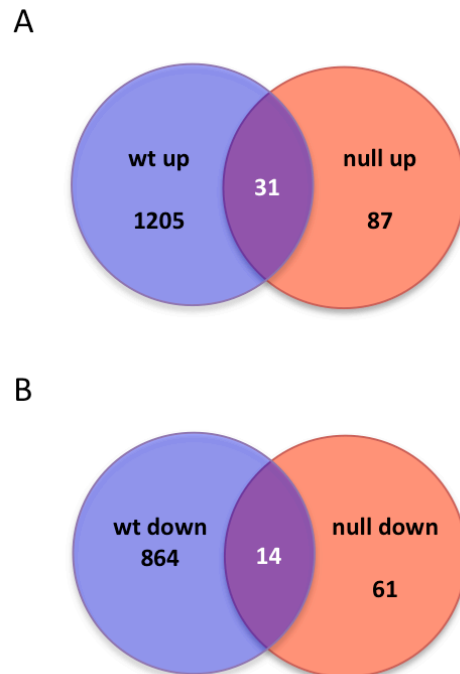

**Figure S10** – Specificity of GW501516. Mouse bone marrow cells from wt and *Ppard* null mice were cultured for 2 days in GM-CSF, yielding a mixed population of granulocytes and immature monocytic cells at different stages of differentiation, as described in ref. 36. These cells were treated for 1 day with 1  $\mu$ M GW501516 or solvent (DMSO) in the presence of GM-CSF. RNA was analyzed by microarrays as published (36). The Venn diagrams show the number of genes induced (A) or down-regulated (B) by the ligand in either wt (blue) or null (red) mice (fold change >1.5).
